# Supplementary material for: SARS-CoV-2 Proteins Induce IFNG in Th1 Lymphocytes Generated from CD4+ Cells from Healthy, Unexposed Polish Donors
Source: Vaccines (Basel). 2020 Nov 12;8(4):673. doi: 10.3390/vaccines8040673 (PMC7712722; doi:10.3390/vaccines8040673)
Supplement: Supplementary file 1 [file vaccines-08-00673-s001.xls]

## Sheet: Fig.1A
INFG mRNA measured using realt time RTPCR and standardized as described in Material and Methods section
donor	control	S-protein	N-protein
1	2.18292	29.7562	22.6939
2	1.45656	8.9368	5.41983
3	14.5161	45.1826	56.8179
4	15.2209	28.2367	64.0421
5	8.61552	70.8676	38.2436
6	1.52124	18.8099	22.7279
7	0.338771	3.37805	1.84648
Group	N	Missing	Median	0.25	0.75
Col 1	7	0	2.183	1.473	13.041
Col 2	7	0	28.237	11.405	41.326
Col 3	7	0	22.728	9.738	52.174
Chi-square= 10.571 with 2 degrees of freedom. P(est.)= 0.005 P(exact)= 0.003
The differences in the median values among the treatment groups are greater than would be expected by chance; there is a statistically significant difference (P = 0.003)
To isolate the group or groups that differ from the others use a multiple comparison procedure.
All Pairwise Multiple Comparison Procedures (Student-Newman-Keuls Method) :
Comparison	Diff of Ranks	q	P<0.05
Col 2 vs Col 1	11	4.158	Yes
Col 2 vs Col 3	1	0.535	No
Col 3 vs Col 1	10	5.345	Yes

## Sheet: Fig.2
INF-gamma (ng/ml) protein measured using ELISA
donor	control	S-protein	N-protein
1	3491.7	6327.9	9950.8
2	11262	17704	18605
3	13716	21135	19464
4	10847	22041	19354
5	28113	43636	44318
6	21209	36871	36241
7	19209	29379	28921
Group	N	Missing	Median	0.25	0.75
Col 1	7	0	13716	10950.8	20709
Col 2	7	0	22041	18561.8	34998
Col 3	7	0	19464	18792.2	34411
Chi-square= 10.571 with 2 degrees of freedom. P(est.)= 0.005 P(exact)= 0.003
The differences in the median values among the treatment groups are greater than would be expected by chance; there is a statistically significant difference (P = 0.003)
To isolate the group or groups that differ from the others use a multiple comparison procedure.
All Pairwise Multiple Comparison Procedures (Student-Newman-Keuls Method) :
Comparison	Diff of Ranks	q	P<0.05
Col 2 vs Col 1	11	4.158	Yes
Col 2 vs Col 3	1	0.535	No
Col 3 vs Col 1	10	5.345	Yes

## Sheet: Fig. 4A
INFG mRNA measured using realt time RTPCR and standardized as described in Material and Methods section
donor	control	S-protein	N-protein
8	1.18625	9.78661	7.90248
9	0.904658	1.87555	2.22007
10	10.6246	61.8986	58.197
11	9.98451	88.2694	62.5936
12	16.9657	97.2945	75.9523
13	9.59443	28.599	53.4664
14	91.7304	275.727	279.669
Group	N	Missing	Median	0.25	0.75
Col 1	7	0	9.985	3.288	15.38
Col 2	7	0	61.899	14.49	95.038
Col 3	7	0	58.197	19.293	72.613
Chi-square= 10.571 with 2 degrees of freedom. P(est.)= 0.005 P(exact)= 0.003
The differences in the median values among the treatment groups are greater than would be expected by chance; there is a statistically significant difference (P = 0.003)
To isolate the group or groups that differ from the others use a multiple comparison procedure.
All Pairwise Multiple Comparison Procedures (Student-Newman-Keuls Method) :
Comparison	Diff of Ranks	q	P<0.05
Col 2 vs Col 1	11	4.158	Yes
Col 2 vs Col 3	1	0.535	No
Col 3 vs Col 1	10	5.345	Yes
